# Supplementary material for: Enhancement of thermoelectric properties of Yb-filled skutterudites by an Ni-Induced “core–shell” structure
Source: Royal Society of Chemistry journal article supplement (doi:10.1039/c4ta05083e), 2014-11-05
Supplement: c4ta05083e1.pdf [file c4ta05083e1.pdf]

## Enhancement of Thermoelectric Properties of Yb-filled Skutterudites by Ni Induced “Core-shell” Structure

Liangwei Fu,<sup>a</sup> Junyou Yang,<sup>\*a</sup> Jiangying Peng,<sup>b</sup> Qinghui Jiang,<sup>a</sup> Ye Xiao,<sup>a</sup> Yubo Luo,<sup>a</sup> Dan Zhang,<sup>a</sup> Zhiwei Zhou,<sup>a</sup> Mingyang Zhang,<sup>a</sup> Yudong Cheng<sup>a</sup> and Fuqiang Cheng<sup>c</sup>

<sup>\*</sup>To whom correspondence should be addressed. Email: [jyyang@mail.hust.edu.cn](mailto:jyyang@mail.hust.edu.cn)

### XRD patterns

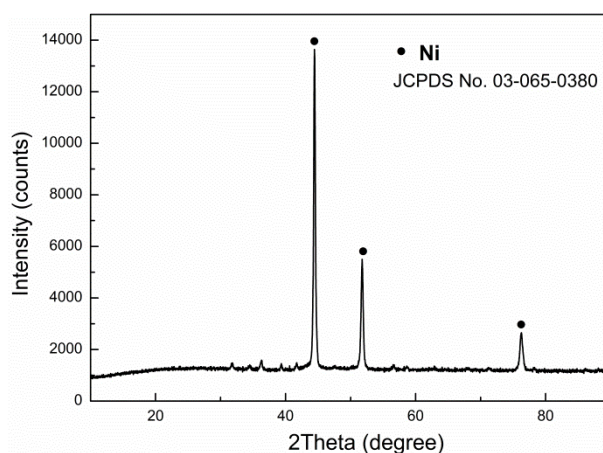

Figure S1 the XRD pattern of the product of thermal decomposition of nickel acetate under the special reducing gas.

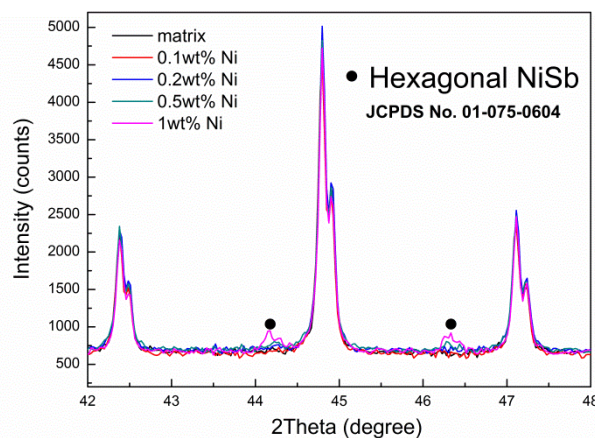

Figure S2 the XRD pattern of the studied samples in the 2Theta range of 42 to 48 degrees. The pattern of 1wt% Ni sample is also shown.

Table S1: the normalized compositions of the randomly selected normal and nano grains in matrix sample and 0.2wt% Ni sample.

|                | Grain number | Yb   | Co   | Ni   | Sb |
|----------------|--------------|------|------|------|----|
| Normal grain 1 | 1            | 0.15 | 3.69 | --   | 12 |
| Normal grain 2 | 2            | 0.11 | 3.97 | --   | 12 |
| Normal grain 3 | 3            | 0.13 | 3.89 | --   | 12 |
| Normal grain 4 | 4            | 0.08 | 3.62 | --   | 12 |
| Nano grain 1   | 5            | 0.10 | 3.78 | 0.06 | 12 |
| Nano grain 2   | 6            | 0.14 | 3.57 | 0.10 | 12 |
| Nano grain 3   | 7            | 0.18 | 3.52 | 0.11 | 12 |

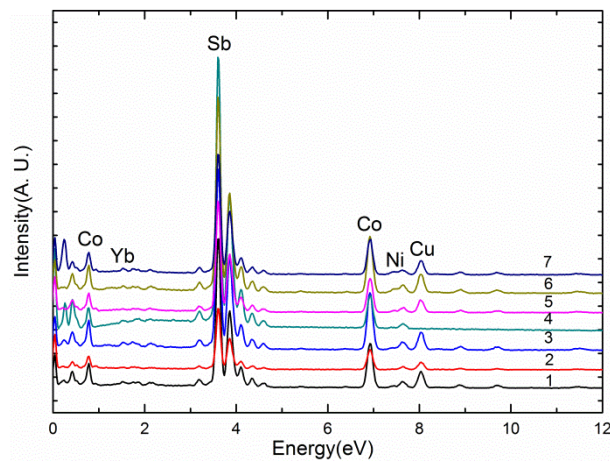

Figure S3 The EDS curves corresponding to the grains in Table S1. The appearance of Cu peak in the profiles is due to the copper ring used for sample supporting for the TEM analysis. The line of 4 is obtained on the matrix sample in the SEM equipped with an EDS detector on which the Cu peak is absent.

Table S2 Input parameters for calculation of relaxation time rate of phonon scattering for 0.2wt% Ni sample.

| Relaxation time rate                                                                                                                                    | Parameter                                                | Symbol               | Value                                                 |
|---------------------------------------------------------------------------------------------------------------------------------------------------------|----------------------------------------------------------|----------------------|-------------------------------------------------------|
| $\tau_U^{-1} \approx \frac{\hbar\gamma^2}{Mv^2\theta_D} \omega^2 T \exp(-\theta_D/3T)$ [4]                                                              | Gruneisen parameter of 0.2wt% Ni sample                  | $\gamma$             | 0.95 [1]                                              |
|                                                                                                                                                         | Average sound velocity of 0.2wt% Ni sample               | v(m/s)               | 2934 [1]                                              |
|                                                                                                                                                         | Debye temperature of 0.2wt% Ni sample                    | $\theta_D$ (K)       | 311 [2]                                               |
|                                                                                                                                                         | Average mass of an atom of 0.2wt% Ni sample              | M (kg)               | $1.776 \times 10^{-25}$                               |
| $\tau_N^{-1} \approx \beta \tau_U^{-1}$                                                                                                                 | Ration of normal phonon scattering to Umklapp scattering | $\beta$              | 2.75 [3]                                              |
| $\tau_{PD}^{-1} \approx x(1-x) \frac{M(Yb)}{M}$ [3]<br>$M = 4M(Co) + 12M(Sb) + 0.2M(Yb)$<br>Neglecting the mass fluctuation from Ni substitution for Co | Mass of an atom Co                                       | M(Co) (g/mol)        | 58.9332                                               |
|                                                                                                                                                         | Mass of an atom Sb                                       | M(Sb) (g/mol)        | 121.76                                                |
|                                                                                                                                                         | Mass of an atom Yb                                       | M(Yb) (g/mol)        | 173.04                                                |
|                                                                                                                                                         | Mass of 0.2wt% Ni sample                                 | M (g/mol)            | 1731.4608                                             |
| $\tau_B^{-1} = \frac{v}{L}$ [5]                                                                                                                         | The grain size                                           | L (nm)               | 120 for the nanograins;<br>6000 for the normal grains |
| $\tau_R^{-1} = \frac{C\omega^2}{(\omega_0^2 - \omega^2)^2}$ [5]                                                                                         |                                                          | C (s <sup>-3</sup> ) | $3.072 \times 10^{33}$ [5]                            |
|                                                                                                                                                         | Resonance frequency                                      | $\omega_0$ (THz)     | 3.409 [5]                                             |

## References

- [1] T. Caillat, A. Borshchovsky, J. P. Fleurial, Journal of Applied Physics, 1996, 80, 4442
- [2] Jiangying Peng, Wei Xu, Yonggao Yan, Junyou Yang, Liangwei Fu, H. Kang, Jian He, Journal of Applied Physics, 2012, 112, 024909
- [3] G. S. Nolas, J. L. Cohn, G. A. Slack, Physical Review B, 1998, 58, 164
- [4] L. D. Zhao, H. J. Wu, S. Q. Hao, C. I. Wu, X. Y. Zhou, K. Biswas, J. Q. He, T. P. Hogan, C. Uher, C. Wolverton, V. P. Dravid, M. G. Kanatzidis, Energy & Environmental Science, 2013, 3, 3346
- [5] G. S. Nolas, G. Fowler, J. Yang, Journal of Applied Physics, 2006, 100, 043705
